# Supplementary material
Source: PubMed Central journal article supplement (PMC6583010)
Supplement: jama-e1810359-s002.pdf [file jama-e1810359-s002.pdf]

## Supplementary Online Content

Webster R, Salam A, de Silva HA, et al; for the TRIUMPH Study Group. Fixed low-dose triple combination antihypertensive medication vs usual care for blood pressure control in patients with mild to moderate hypertension in Sri Lanka: a randomized clinical trial. *JAMA*. doi:10.1001/jama.2018.10359

### eText

**eTable 1.** Listing of standard daily doses of blood pressure medication used in the study

**eTable 2.** Baseline characteristics by randomized group and blood pressure lowering drug use at baseline

**eTable 3.** Sensitivity analysis for primary and secondary BP targets outcomes using fully conditional specification for multiple imputation

**eTable 4.** Reasons for discontinuing any blood pressure lowering medication by group

**eTable 5.** Number of blood pressure lowering classes and number of blood pressure lowering pills taken by randomized group, and by baseline therapy

**eTable 6.** Adverse events, serious adverse events and changes in laboratory parameters in the safety population as defined in the statistical analysis plan

**eTable 7.** Classification of reported serious adverse events

**eTable 8.** Change in urinary albumin-creatinine ratio from baseline to 6 months by subgroups defined by baseline characteristics

**eTable 9.** Fasting LDL cholesterol, triglycerides and glucose at the final (6 month) study visit

This supplementary material has been provided by the authors to give readers additional information about their work.

## eText

### Study population for analysis of effectiveness and safety

The pre-specified Statistical Analysis Plan defined the selection of subjects to be included in the analyses in the following manner (Section 7.2 of the Statistical Analysis Plan):

#### Selection of Subjects to be included in the Analyses

##### Intent-to-treat (ITT)

- Received at least one dose of Triple Combination Pill for the Intervention arm
- Some post-randomization data of SBP and DBP are available

##### Safety

- Some post-randomization data relating to safety are available.

The following statement provides clarification of the definitions used:

##### Intent-to-treat (ITT)

- All patients randomized to Triple Combination Pill received at least one dose of Triple Combination Pill. The ITT population therefore included all randomized participants.
- Patients with missing BP data for any particular visit were not included for efficacy analyses for that visit (missing data for SBP and DBP were not imputed for any visit, as fewer than 10% of data were missing - Section 6.2 of the Statistical Analysis Plan)
- For every efficacy variable, the analysis included all randomized patient with data available for that variable.

##### Safety

- All except 7 randomized patients had some post-randomization data recorded. It cannot be confirmed whether or not there was any opportunity to report adverse events in these 7 patients.

To maximize comparability in the assessment of efficacy and safety, the ITT population (i.e. all randomized patients) has been used for all analyses in the study report, including all available data. However due to the ambiguity in the definition of the Safety population, we have repeated the adverse event analyses excluding the 7 randomized patients without any post-randomization data recorded. The findings are presented in eTable 6 and do not alter the conclusions.

## **Product manufacture and quality control for over-encapsulated Triple Combination Pill**

Study capsules were manufactured by Pharmaceutical Packaging Professionals, Melbourne, Australia, a current Good Manufacturing Practice certified company. Individual component tablets, all approved by the Australian Therapeutic Goods Administration, were over-encapsulated with gelatin capsules.

The first batch of approximately 6,700 capsules was hand filled, which involved opening the capsules and placing one of each tablet into the capsule. The remaining capsules were filled using a semi-automatic process with a capsule filler that holds and splits 300 capsules.

As capsules were not sealed, all returned capsules were precision weighed at the end of the study as a quality control exercise. For returned capsules in bottles the capsule error rates (representing potential over-filling or under-filling of capsules) for manually filled and semi-automated batches were 0.40% and 0.33%, respectively, of total capsules. For samples retained by the manufacturer the overall error rate was 0.04%. This suggests that a small number of study participants and/or center staff may have opened capsules, contributing to the higher error rate in returned capsules.

## **Methods for blood pressure measurement**

### **Instructions provided in Manual of Procedures**

1. Participants should be asked to avoid smoking or drinking tea/coffee, exercise for at least 30 minutes before measuring the blood pressure (BP).
2. Allow the participants to sit for at least 5 minutes in a quiet room before beginning BP measurement.
3. Arm circumference (AC) should be measured midway between the shoulder tip and the olecranon process. If  $AC < 32\text{cm}$  use standard cuff (12-13cm long and 35cm wide); if  $AC \geq 32\text{cm}$  use large cuff. If arm circumference  $< 24\text{cm}$  use the standard cuff adjusting the cuff as appropriate.
4. Have the cuff at the heart level, whatever the position of the patient.
5. Measure heart rate by pulse palpation and check for atrial fibrillation. In the circumstance of atrial fibrillation, revert to using a standard mechanical sphygmomanometer.
6. Take three measurements spaced by 1–2 minutes, and additional measurements if the second and third readings differ by more than 10mmHg SBP or 5mmHg DBP. Ensure that the BP reading is printed after each measurement, and attached to the BP measurement log. The eCRF will calculate the average of the 2nd and 3rd readings automatically.
7. Record the average of the second and third readings for average systolic and diastolic BP.
8. Ensure blood pressure is measured using the same arm and same cuff size at subsequent visits throughout the trial.

Wait 1-2 minutes before repeating the BP measurement (steps 9. to 12.) in the same arm.

## **Definitions of adverse event and serious adverse event**

### **Adverse Event**

An AE is any untoward medical occurrence in a patient or clinical investigation subject administered a pharmaceutical product and that does not necessarily have a causal relationship with this treatment. An AE can therefore be any unfavorable and unintended sign (including an abnormal laboratory finding), symptom, or disease temporally associated with the use of a medicinal (investigational) product, whether or not related to the medicinal (investigational) product.

### **Serious Adverse Event:**

Any untoward medical occurrence during a clinical trial that is associated with any of the following:

- Death
- Life-threatening condition
- In-patient hospitalization
- Prolongation of hospitalization
- Persistent or significant disability or incapacity
- A congenital anomaly or birth defect

**eTable 1.** Listing of standard daily doses of blood pressure medication used in the study

| <b>Medication</b>    | <b>Standard daily dose</b> |
|----------------------|----------------------------|
| Amiloride            | 10 mg                      |
| Amlodipine           | 5 mg                       |
| Atenolol             | 50 mg                      |
| Bisoprolol           | 10 mg                      |
| Captopril            | 100 mg                     |
| Carvedilol           | 25 mg                      |
| Chlorthalidone       | 25 mg                      |
| Diltiazem            | 180 mg                     |
| Enalapril            | 20 mg                      |
| Furosemide           | 40 mg                      |
| Hydrochlorothiazide  | 25 mg                      |
| Indapamide           | 2.5 mg                     |
| Losartan             | 50 mg                      |
| Metoprolol           | 100 mg                     |
| Nebivolol            | 5 mg                       |
| Nifedipine           | 40 mg                      |
| Perindopril arginine | 5 mg                       |
| Prazosin             | 2 mg                       |
| Propranolol          | 160 mg                     |
| Ramipril             | 2.5 mg                     |
| Spirolactone         | 50 mg                      |
| Telmisartan          | 40 mg                      |
| Verapamil            | 240 mg                     |

Based on as described by Bennett et al<sup>21</sup> and Law et al.<sup>14</sup>

**eTable 2.** Baseline characteristics by randomized group and blood pressure lowering drug use at baseline

| Characteristics                                                  | Triple Combination Pill<br>(N=349) |                      | Usual Care<br>(N=351)     |                      |
|------------------------------------------------------------------|------------------------------------|----------------------|---------------------------|----------------------|
|                                                                  | Not on treatment<br>N=209          | Monotherapy<br>N=140 | Not on treatment<br>N=204 | Monotherapy<br>N=147 |
| Age (years)                                                      | 54.2 (11.8)                        | 59.8 (9.6)           | 54.9 (10.9)               | 57.5 (10.3)          |
| Female sex – no. (%)                                             | 109 (52.2%)                        | 98 (70.0%)           | 105 (52.0%)               | 91 (62.0%)           |
| Anti-platelet use – no. (%)                                      |                                    |                      |                           |                      |
| Aspirin                                                          | 10 (4.8%)                          | 26 (18.6%)           | 6 (3.0%)                  | 22 (15.0%)           |
| Clopidogrel                                                      | 3 (1.4%)                           | 7 (5.0%)             | 2 (1.0%)                  | 8 (5.4%)             |
| Statin use – no. (%)                                             | 25 (12.0%)                         | 72 (51.4%)           | 10 (4.9%)                 | 74 (50.3%)           |
| Current tobacco use<br>(Cigarette, cigar or<br>chewing – no. (%) | 24 (11.5%)                         | 15 (10.7%)           | 22 (10.8%)                | 12 (8.2%)            |
| Current alcohol use – no<br>(%)                                  | 28 (13.4%)                         | 14 (10%)             | 22 (10.8%)                | 12 (8.2%)            |
| Medical history – no. (%)                                        |                                    |                      |                           |                      |
| History of coronary<br>artery disease                            | 13 (6.2%)                          | 17 (12.1)            | 8 (3.9%)                  | 14 (9.5%)            |
| History of<br>cerebrovascular disease                            | 2 (1.0%)                           | 11 (7.9%)            | 2 (1.0%)                  | 5 (3.4%)             |
| Chronic kidney disease                                           | 1 (0.5%)                           | 6 (4.3%)             | 1 (0.5%)                  | 2 (1.4%)             |
| Type 1 Diabetes                                                  | 0 (0.0%)                           | 1 (0.7%)             | 0 (0%)                    | 1 (0.7%)             |

| Characteristics                                | Triple Combination Pill<br>(N=349) |                      | Usual Care<br>(N=351)     |                      |
|------------------------------------------------|------------------------------------|----------------------|---------------------------|----------------------|
|                                                | Not on treatment<br>N=209          | Monotherapy<br>N=140 | Not on treatment<br>N=204 | Monotherapy<br>N=147 |
| Type 2 Diabetes                                | 40 (19.1%)                         | 71 (50.7%)           | 43 (21.1%)                | 64 (43.5%)           |
| Gout                                           | 0 (0.0%)                           | 1 (0.7%)             | 1 (0.5%)                  | 1 (0.7%)             |
| Physiological variables                        |                                    |                      |                           |                      |
| Systolic blood pressure –<br>mmHg (mean ± SD)  | 155.4 (10.7)                       | 152.4 (12.0)         | 155.7 (11.0)              | 152.0 (12.1)         |
| <130                                           | 1 (0.5%)                           | 3 (2.1%)             | 0 (0.0%)                  | 2 (1.4%)             |
| ≥130 to <140                                   | 11 (5.3%)                          | 19 (13.6%)           | 12 (5.9%)                 | 22 (15.0%)           |
| ≥140 to <150                                   | 61 (29.2%)                         | 38 (27.1%)           | 57 (27.9%)                | 48 (32.7%)           |
| ≥ 150                                          | 136 (65.1%)                        | 80 (57.1%)           | 135 (66.2%)               | 75 (51.0%)           |
| Diastolic blood pressure –<br>mmHg (mean ± SD) | 91.9 (8.7)                         | 85.8 (9.9)           | 91.9 (9.1)                | 87.3 (9.9)           |
| < 80                                           | 17 (8.1%)                          | 40 (28.6%)           | 23 (11.3%)                | 36 (24.5%)           |
| ≥80 to <90                                     | 56 (26.8%)                         | 50 (35.7%)           | 51 (25.0%)                | 47 (32.0%)           |
| ≥90 to <100                                    | 98 (46.9%)                         | 39 (27.9%)           | 88 (43.1%)                | 56 (38.1%)           |
| ≥ 100                                          | 38 (18.2%)                         | 11 (7.9%)            | 42 (20.6%)                | 8 (5.4%)             |
| eGFR - mL/min/1.73m2<br>(mean ± SD)            | 92.3 (19.3)                        | 86.8 (19.8)          | 93.2 (18.2)               | 89.9 (19.0)          |
| <30 mL/min/1.73m2                              | 3/209 (1.4%)                       | 1/204 (0.5%)         | 1/140 (0.7%)              | 2/147 (1.4%)         |
| ≥ 30 to <50<br>mL/min/1.73m2                   | 3/209 (1.4%)                       | 3/204 (1.5%)         | 9/140 (6.4%)              | 1/147 (0.7%)         |
| ≥50 mL/min/1.73m2                              | 203/209 (97.1%)                    | 200/204 (98.0%)      | 130/140 (92.9%)           | 144/147 (98.0%)      |

| Characteristics                                                                                                                                                         | Triple Combination Pill<br>(N=349) |                      | Usual Care<br>(N=351)     |                      |
|-------------------------------------------------------------------------------------------------------------------------------------------------------------------------|------------------------------------|----------------------|---------------------------|----------------------|
|                                                                                                                                                                         | Not on treatment<br>N=209          | Monotherapy<br>N=140 | Not on treatment<br>N=204 | Monotherapy<br>N=147 |
| Heart rate – beats per minute (mean ± SD)                                                                                                                               | 78.5 (12.1)                        | 77.6 (13.0)          | 77.9 (11.6)               | 77.9 (11.4)          |
| Overweight (BMI ≥ 25 to 30 kg/m <sup>2</sup> ) – no. (%)                                                                                                                | 74 (35.4)                          | 67 (32.8)            | 42 (30.0%)                | 54 (36.7%)           |
| Obese (BMI > 30 kg/m <sup>2</sup> )                                                                                                                                     | 37 (17.7)                          | 27 (19.3)            | 37 (18.1)                 | 31 (21.1)            |
| LDL cholesterol – mg/dL (mean ± SD)                                                                                                                                     | 132.4 (41.0)                       | 111.1 (39.0)         | 135.6 (41.1)              | 115.7 (38.9)         |
| HDL cholesterol – mg/dL (mean ± SD)                                                                                                                                     | 46.8 (12.9)                        | 48.7 (12.1)          | 46.3 (12.4)               | 45.6 (12.8)          |
| Triglycerides – mg/dL (mean ± SD)                                                                                                                                       | 162.0 (84.8)                       | 142.5 (79.6)         | 169.1 (86.5)              | 152.4 (76.5)         |
| Glucose (combined fasting and non-fasting) – mg/dL (mean ± SD)                                                                                                          | 111.5 (42.9)                       | 127.7 (66.2)         | 115.5 (49.1)              | 127.6 (62.3)         |
| Type 1 Diabetes <sup>a</sup>                                                                                                                                            | N/A                                | 120.00 (N/A)         | N/A                       | 123.00 (N/A)         |
| Type 2 Diabetes                                                                                                                                                         | 160.0 (56.7)                       | 157.2 (81.4)         | 170.4 (70.4)              | 163.6 (75.4)         |
| No Diabetes                                                                                                                                                             | 100.0 (28.9)                       | 97.0 (16.9)          | 100.8 (27.0)              | 99.6 (27.8)          |
| Creatinine - mg/dL (mean ± SD)                                                                                                                                          | 0.90 (1.0)                         | 0.86 (0.6)           | 0.82 (0.3)                | 0.82 (0.3)           |
| Urine albumin:creatinine ratio – mg/g (median, IQR)                                                                                                                     | 17.0 (8.0, 40.0)                   | 17.0 (10.0, 40.0)    | 18.0 (9.0, 52.0)          | 17.0 (9.0, 42.0)     |
| <sup>a</sup> In the ‘Not on treatment’ group there were no patients with Type 1 Diabetes and only two patients in the Monotherapy group – one in each randomized group. |                                    |                      |                           |                      |



**eTable 3.** Sensitivity analysis for primary and secondary BP targets outcomes using Fully Conditional Specification for multiple imputation

| <b>Visit</b>                                 | <b>Relative risk (95% CI)</b>            | <b>P value</b> |
|----------------------------------------------|------------------------------------------|----------------|
| <b>Achieving BP target</b>                   |                                          |                |
| Week 6                                       | 1.51 (1.31; 1.74)                        | <.0001         |
| Week 12                                      | 1.50 (1.32; 1.71)                        | <.0001         |
| Week 24                                      | 1.23 (1.09; 1.39)                        | 0.0006         |
| <b>Mean change in BP</b>                     |                                          |                |
|                                              | <b>Modeled treatment effect (95% CI)</b> |                |
| Mean (SEM) change in SBP at 6 months – mm Hg | -8.7 (-11.0; -6.3)                       | <.0001         |
| Mean (SEM) change in DBP at 6 months – mm Hg | -4.5 (-6.0; -3.1)                        | <.0001         |

**eTable 4.** Reasons for discontinuing any blood pressure lowering medication by group

|                                            | <b>Triple<br/>Combination Pill<br/>(N=349)</b> | <b>Usual Care<br/>(N=351)</b> |
|--------------------------------------------|------------------------------------------------|-------------------------------|
| Dizziness                                  | 6 (1.7%)                                       | 2 (0.6%)                      |
| Cough                                      | 0 (0.0%)                                       | 6 (1.7%)                      |
| Hypotension                                | 3 (0.9%)                                       | 5 (1.4%)                      |
| Headache                                   | 1 (0.3%)                                       | 1 (0.3%)                      |
| Edema                                      | 2 (0.6%)                                       | 3 (0.9%)                      |
| Nausea or Vomiting                         | 1 (0.3%)                                       | 0 (0.0%)                      |
| Constipation                               | 0 (0.0%)                                       | 1 (0.3%)                      |
| Electrolyte imbalance                      | 3 (0.9%)                                       | 4 (1.1%)                      |
| Ankle/pedal oedema                         | 0 (0.0%)                                       | 3 (0.9%)                      |
| Mild chest pain                            | 1 (0.3%)                                       | 1 (0.3%)                      |
| Loss of appetite                           | 1 (0.3%)                                       | 0 (0.0%)                      |
| Difficult breathing                        | 1 (0.3%)                                       | 0 (0.0%)                      |
| Headache/gastritis/dizziness <sup>a</sup>  | 1 (0.3%)                                       | 0 (0.0%)                      |
| Hypersensitivity                           | 1 (0.3%)                                       | 0 (0.0%)                      |
| Dyspepsia                                  | 1 (0.0%)                                       | 0 (0.0%)                      |
| Unspecified adverse event                  | 1 (0.3%)                                       | 1 (0.3%)                      |
| Increased urinary albumin creatinine ratio | 0 (0.0%)                                       | 1 (0.3%)                      |

<sup>a</sup>all three reported as one event.

**eTable 5.** Number of blood pressure lowering classes and number of blood pressure lowering pills taken by randomized group, and by baseline therapy

|                                     | Baseline                |            | 6 weeks                 |            | 12 weeks                |            | 6 months                |            |
|-------------------------------------|-------------------------|------------|-------------------------|------------|-------------------------|------------|-------------------------|------------|
|                                     | Triple Combination Pill | Usual Care |
| <b>Not on treatment at baseline</b> |                         |            |                         |            |                         |            |                         |            |
| Data available                      | 209                     | 204        | 203                     | 201        | 201                     | 199        | 200                     | 196        |
| Mean number of BP lowering classes  | 0.0                     | 0.0        | 2.9                     | 1.2        | 2.9                     | 1.3        | 2.8                     | 1.4        |
| Mean number of BP lowering pills    | 0.0                     | 0.0        | 1.1                     | 2.0        | 1.1                     | 2.2        | 1.1                     | 2.3        |
|                                     |                         |            |                         |            |                         |            |                         |            |
| <b>Monotherapy at baseline</b>      |                         |            |                         |            |                         |            |                         |            |
| Data Available                      | 140                     | 147        | 136                     | 146        | 136                     | 146        | 134                     | 145        |
| Mean number of BP lowering classes  | 1.0                     | 1.0        | 2.8                     | 1.2        | 2.8                     | 1.3        | 2.7                     | 1.4        |
| Mean number of BP lowering pills    | 1.8                     | 1.8        | 1.1                     | 2.1        | 1.2                     | 2.4        | 1.2                     | 2.4        |

**eTable 6.** Adverse events, serious adverse events and changes in laboratory parameters in the safety population as defined in the statistical analysis plan

|                                                                                                  | <b>Triple Combination Pill<br/>(N=344)</b> | <b>Usual Care<br/>(N=349)</b> |
|--------------------------------------------------------------------------------------------------|--------------------------------------------|-------------------------------|
| Participants with at least one adverse event, no. (%)                                            | 133 (38.7%)                                | 121 (34.7%)                   |
| Participants with at least one serious adverse event, no. (%)                                    | 27 (7.8%)                                  | 21 (6.0%)                     |
| Participants discontinuing a blood pressure lowering medication due to an adverse event, no. (%) | 23 (6.7%)                                  | 24 (6.9%)                     |
| Laboratory parameters –Mean change (SEM) levels from baseline to 6 months;                       |                                            |                               |
| LDL cholesterol – mg/dL                                                                          | -4.8 (2.9)                                 | -12.9 (2.8)                   |
| HDL cholesterol – mg/dL                                                                          | 1.0 (0.6)                                  | 1.1 (0.6)                     |
| Triglycerides – mg/dL                                                                            | -27.2 (4.9)                                | -26.9 (4.8)                   |
| Creatinine – mg/dL                                                                               | 0.07 (0.04)                                | 0.03 (0.04)                   |
| Uric acid – mg/dL                                                                                | 0.6 (0.07)                                 | -0.04 (0.07)                  |
| Sodium – mmol/L                                                                                  | -0.03 (0.16)                               | 0.67 (0.16)                   |
| Potassium – mmol/L                                                                               | -0.11 (0.04)                               | 0.11 (0.03)                   |
| ALT – IU/L                                                                                       | -1.5 (1.1)                                 | -3.8 (1.1)                    |
| AST – IU/L                                                                                       | -1.5 (0.9)                                 | -1.9 (0.8)                    |
| Glucose – mg/dL                                                                                  | 0.5 (3.2)                                  | -1.8 (3.1)                    |
| UACR – mg/g                                                                                      | -40.8 (5.7)                                | -21.9 (5.7)                   |

CI denotes confidence interval. SEM denotes standard error of mean.

To convert the values for cholesterol to millimoles per liter, multiply by 0.02586. To convert the values for triglycerides to millimoles per liter, multiply by 0.01129. To convert the values for blood glucose to millimoles per liter, multiply by 0.05551. To convert the values for creatinine to micromoles per liter, multiply by 88.4. LDL denotes low-density lipoprotein, HDL high-density lipoprotein, ALT alanine transaminase, AST aspartate transaminase, UACR urinary albumin creatinine ratio.

**eTable 7.** Classification of reported serious adverse events

|                                                                      | <b>Triple Combination Pill<br/>(N=349)</b> | <b>Usual Care<br/>(N=351)</b> |
|----------------------------------------------------------------------|--------------------------------------------|-------------------------------|
| Total number of participants with at least one serious adverse event | 27 (7.7%)                                  | 21 (6.0%)                     |
| Death                                                                | 0 (0.0%)                                   | 2 (0.6%)                      |
| Life threatening                                                     | 1 (0.3%)                                   | 0 (0.0%)                      |
| In-patient Hospitalization                                           | 26 (7.4%)                                  | 19 (5.4%)                     |
| Prolongation of hospitalization                                      | 0 (0.0%)                                   | 0 (0.0%)                      |
| Persistent/Significant Disability/Incapacity                         | 0 (0.0%)                                   | 0 (0.0%)                      |
| Congenital Anomaly or Birth Defect                                   | 0 (0.0%)                                   | 0 (0.0%)                      |

**eTable 8.** Change in urinary albumin-creatinine ratio from baseline to 6 months by subgroups defined by baseline characteristics

| Subgroup                         | n   | Triple Pill<br>(N=349)<br>Mean change (95% CI) | Usual Care<br>(N=351)<br>Mean change (95% CI) | Mean difference <sup>a</sup> (95%<br>CI) | P-value | P-value<br>Heterogeneity |
|----------------------------------|-----|------------------------------------------------|-----------------------------------------------|------------------------------------------|---------|--------------------------|
| <b>Age</b>                       |     |                                                |                                               |                                          |         |                          |
| < 57 years                       | 318 | -40.6 (-56.5, -24.6)                           | -33.3 (-49.1, -17.5)                          | -7.3 (-29.7, 15.1)                       | 0.52    | 0.15                     |
| ≥ 57 years                       | 322 | -41.6 (-57.6, -25.7)                           | -11.3 (-26.9, 4.4)                            | -30.4 (-52.6, -8.1)                      | 0.01    |                          |
| <b>Sex</b>                       |     |                                                |                                               |                                          |         |                          |
| Male                             | 268 | -35.5 (-53.1, -17.9)                           | -0.7 (-17.4, 16.1)                            | -34.8 (-59.1, -10.6)                     | 0.01    | 0.08                     |
| Female                           | 372 | -45.0 (-59.5, -30.5)                           | -38.7 (-53.4, -24.0)                          | -6.3 (-26.9, 14.3)                       | 0.55    |                          |
| <b>Diabetes</b>                  |     |                                                |                                               |                                          |         |                          |
| No                               | 445 | -39.6 (-53.1, -26.1)                           | -29.0 (-42.5, -15.5)                          | -10.6 (-29.5, 8.4)                       | 0.27    | 0.12                     |
| Yes                              | 195 | -44.7 (-65.7, -23.7)                           | -6.9 (-27.3, 13.6)                            | -37.8 (-66.5, -9.2)                      | 0.01    |                          |
| <b>Median eGFR</b>               |     |                                                |                                               |                                          |         |                          |
| < 94.3 mL/min/1.73m <sup>2</sup> | 313 | -33.3 (-49.2, -17.3)                           | -7.1 (-23.0, 8.9)                             | -26.2 (-48.7, -3.7)                      | 0.02    | 0.40                     |
| ≥ 94.3 mL/min/1.73m <sup>2</sup> | 327 | -48.8 (-64.6, -33.1)                           | -36.2 (-51.6, -20.8)                          | -12.6 (-34.6, 9.4)                       | 0.26    |                          |
| <b>SBP</b>                       |     |                                                |                                               |                                          |         |                          |

| <b>Subgroup</b>                    | <b>n</b> | <b>Triple Pill<br/>(N=349)<br/>Mean change (95% CI)</b> | <b>Usual Care<br/>(N=351)<br/>Mean change (95% CI)</b> | <b>Mean difference<sup>a</sup> (95%<br/>CI)</b> | <b>P-value</b> | <b>P-value<br/>Heterogeneity</b> |
|------------------------------------|----------|---------------------------------------------------------|--------------------------------------------------------|-------------------------------------------------|----------------|----------------------------------|
| < 148 mmHg                         | 210      | -44.7 (-64.7, -24.6)                                    | -15.8 (-35.0, 3.4)                                     | -28.9 (-56.6, -1.2)                             | 0.04           | 0.69                             |
| 148 - 159.5 mmHg                   | 226      | -35.1 (-53.5, -16.6)                                    | -22.4 (-41.7, -3.1)                                    | -12.7 (-39.3, 14.0)                             | 0.35           |                                  |
| > 159.5 mmHg                       | 204      | -44.7 (-64.9, -24.6)                                    | -28.6 (-48.3, -9.0)                                    | -16.1 (-44.2, 12.0)                             | 0.26           |                                  |
| <b>DBP</b>                         |          |                                                         |                                                        |                                                 |                |                                  |
| < 85.5 mmHg                        | 207      | -35.1 (-55.0, -15.1)                                    | -14.6 (-34.4, 5.1)                                     | -20.4 (-48.3, 7.4)                              | 0.15           | 0.73                             |
| 85.5 - 94.5 mmHg                   | 222      | -43.5 (-61.7, -25.4)                                    | -16.6 (-36.6, 3.4)                                     | -26.9 (-54.0, 0.2)                              | 0.05           |                                  |
| > 94.5 mmHg                        | 211      | -44.6 (-65.6, -23.5)                                    | -33.4 (-51.8, -14.9)                                   | -11.2 (-39.0, 16.6)                             | 0.43           |                                  |
| <b>Blood pressure prescription</b> |          |                                                         |                                                        |                                                 |                |                                  |
| No                                 | 380      | -31.9 (-48.1, -15.8)                                    | -9.1 (-25.9, 7.7)                                      | -22.9 (-43.4, -2.4)                             | 0.03           | 0.64                             |
| Yes                                | 260      | -56.2 (-77.9, -34.6)                                    | -401.0 (-62.1, -19.9)                                  | -15.3 (-40.0, 9.5)                              | 0.23           |                                  |

<sup>a</sup> Mean difference for continuous outcomes estimated from an analysis of covariance. CI denotes confidence interval. eGFR denotes estimated glomerular filtration rate. SBP denotes systolic blood pressure. DBP denotes diastolic blood pressure.



**eTable 9.** Fasting LDL cholesterol, triglycerides and glucose at the final (6 month) study visit

| Parameter               |            | Triple Combination Pill | Usual Care  | Mean Difference <sup>a</sup> | P-value |
|-------------------------|------------|-------------------------|-------------|------------------------------|---------|
| HDL cholesterol (mg/dL) | n          | 293                     | 294         | 587                          |         |
|                         | Mean (SEM) | 48.5 (0.9)              | 47.7 (0.9)  | 0.8 (-1.3, 2.9)              | 0.46    |
| LDL cholesterol (mg/dL) | n          | 293                     | 294         | 587                          |         |
|                         | Mean (SEM) | 118.9 (3.1)             | 112.3 (3.1) | 6.6 (-0.01, 13.2)            | 0.05    |
| Triglycerides (mg/dL)   | n          | 292                     | 294         | 586                          |         |
|                         | Mean (SEM) | 122.0 (3.3)             | 126.1 (3.3) | -4.2 (-13.3, 5.0)            | 0.37    |
| Glucose (mg/dL)         | n          | 293                     | 294         | 587                          |         |
|                         | Mean (SEM) | 115.8 (3.2)             | 111.6 (3.2) | 4.1 (-2.5, 10.8)             | 0.22    |

<sup>a</sup> Mean difference for continuous outcomes estimated from an analysis of covariance. To convert the values for cholesterol to millimoles per liter, multiply by 0.02586. To convert the values for triglycerides to millimoles per liter, multiply by 0.01129. To convert the values for blood glucose to millimoles per liter, multiply by 0.05551. LDL denotes low-density lipoprotein, HDL high-density lipoprotein, SEM standard error of mean.
